# Supplementary material
Source: PubMed Central journal article supplement (PMC4250119)
Supplement: pnas.1415712111.sapp.pdf [file pnas.1415712111.sapp.pdf]

## **Supplementary Information**

Figures S1-S10

Tables S1-S4

Supplemental Materials and Methods

Supplemental References

**Figure S1**

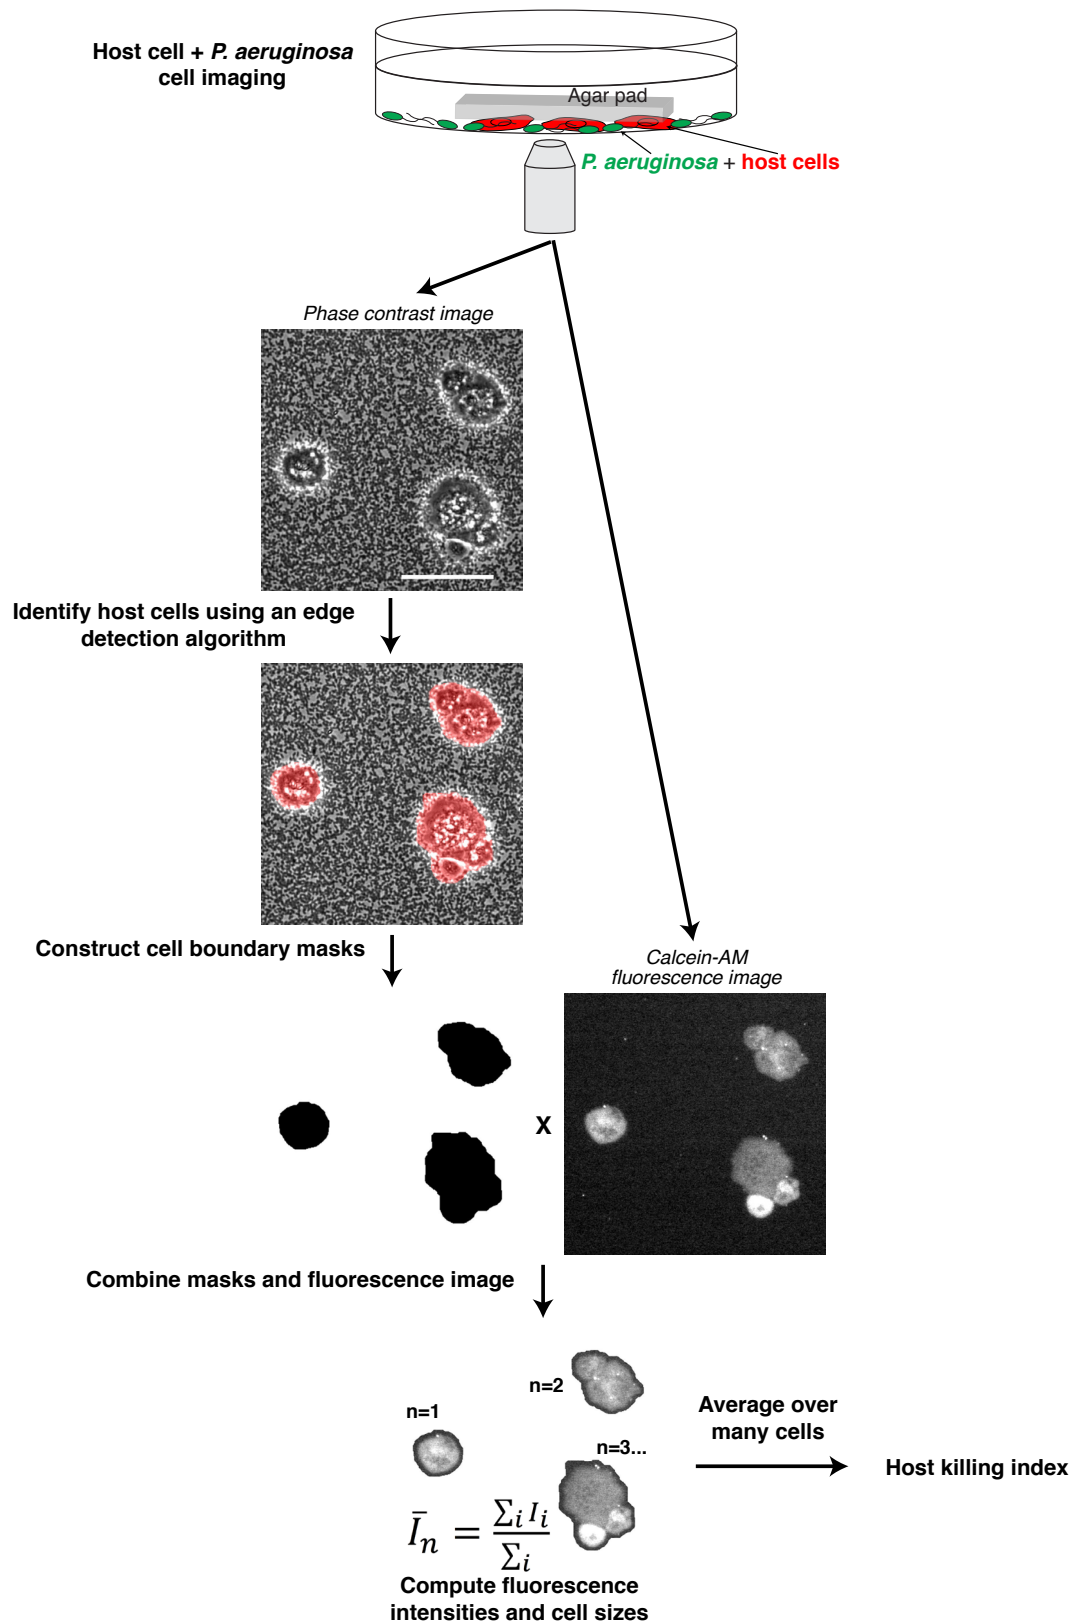

**Figure S1. Schematic depicting software-based automated analysis of the rapid host killing assay.** Phase contrast and calcein-AM fluorescence images are acquired of amoebae mixed with *P. aeruginosa* cells that are immobilized to a single imaging plane by an agar pad. Applying an edge detection algorithm to phase contrast images identifies the boundaries of host cells, which are used to construct cell boundary masks. The masks are combined with calcein-AM images in order to isolate the fluorescence of individual host cells. The average calcein-AM intensity ( $\bar{I}_n$ ) for each host cell is computed by integrating the individual calcein-AM fluorescence pixel intensities ( $I_i$ ) over the entire cell and dividing by the cell size. The host cell killing index is computed by averaging  $\bar{I}_n$  over many cells.

**Figure S2**

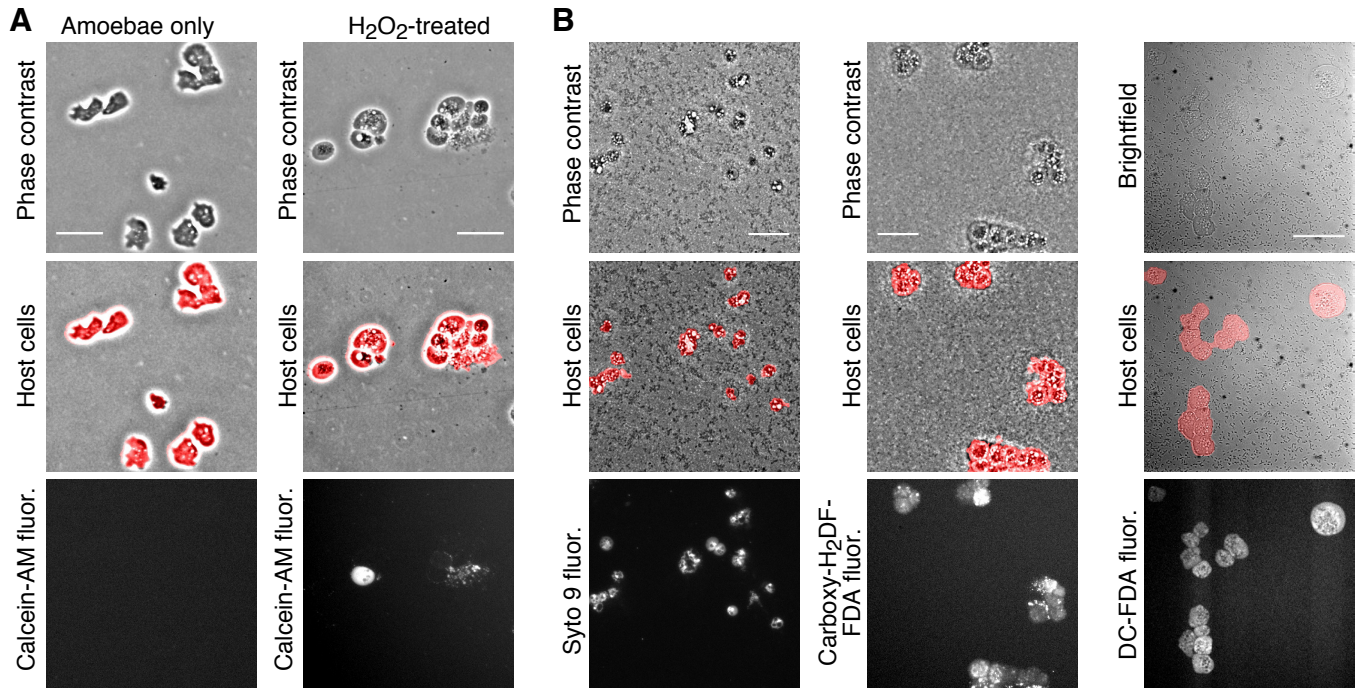

**Figure S2. Using fluorescent markers to assess amoeba cell death.** (A) Phase contrast and calcein-AM fluorescence images of untreated amoebae and amoebae treated with 1% H<sub>2</sub>O<sub>2</sub>. Host cells (red) are identified in phase contrast images using an edge detection algorithm. (B) Phase contrast or bright-field images and fluorescence images of amoebae that have been mixed with surface-attached *P. aeruginosa* cells and with Syto 9, which stains nucleic acids and does not significantly permeate healthy amoeba membranes, or carboxy-H<sub>2</sub>DF-FDA or DC-FDA, which indicate the production of reactive oxygen species. Host cells (red) are identified in phase contrast or bright-field images using an edge detection algorithm. Scale bars represent 50  $\mu$ m.

### Figure S3

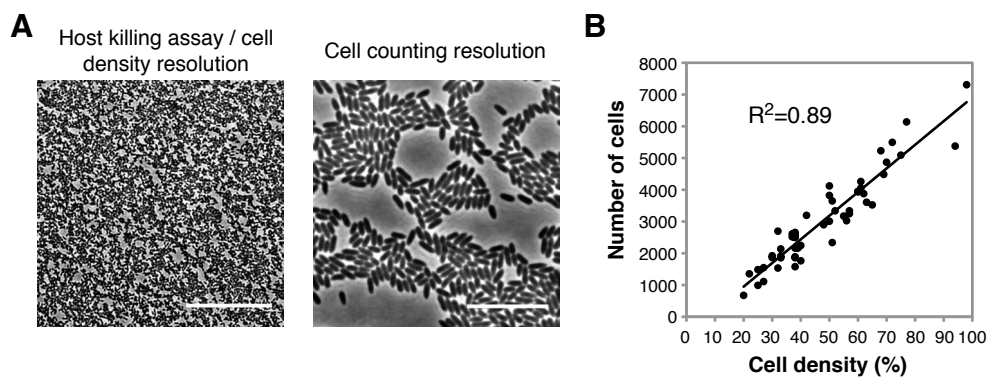

**Figure S3. Correlation between surface cell density and cell number.** (A) Phase contrast images at the resolution used for both host killing assays and measuring *P. aeruginosa* cell densities and at the resolution for counting individual *P. aeruginosa* cells. The scale bars for the cell density and cell counting images represent 50  $\mu\text{m}$  and 10  $\mu\text{m}$ , respectively. (B) A graph indicating the relationship between *P. aeruginosa* cell density and the number of cells in the same imaging field. The least squares fit to a line and coefficient of determination ( $R^2$ ) are shown. Cell density and cell counting measurements are described in the Materials and Methods section.

**Figure S4**

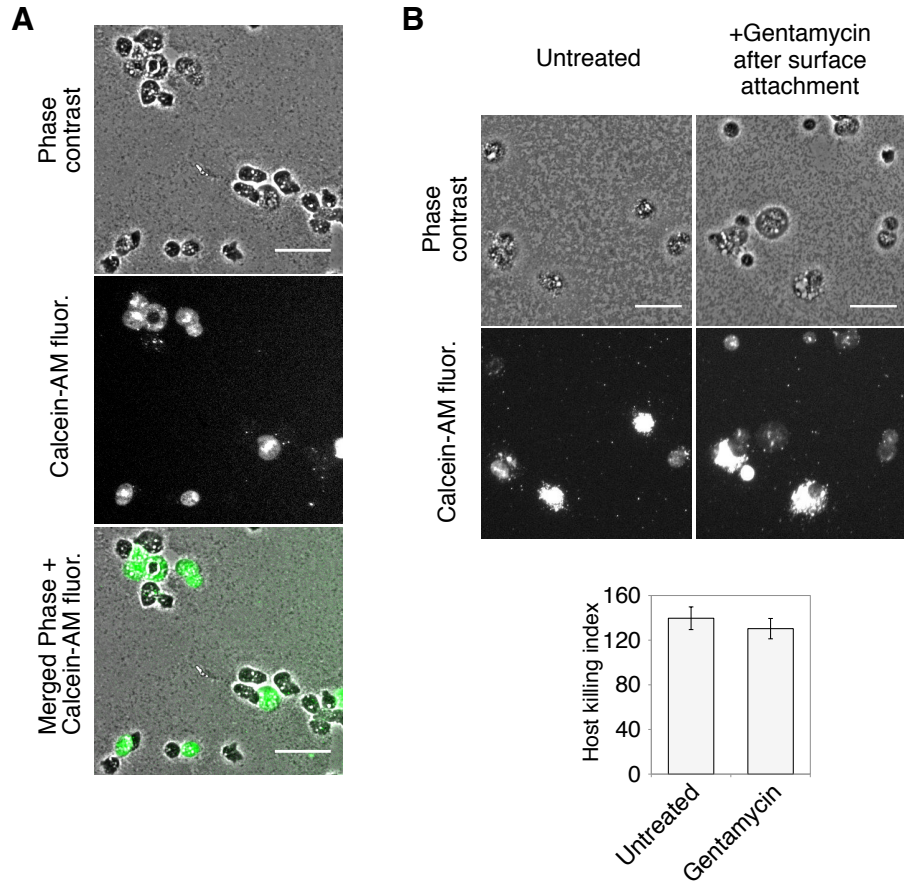

**Figure S4. Effects of attachment time and protein synthesis inhibitors on surface-induced virulence.** Phase contrast, calcein-AM fluorescence, and merged images of *P. aeruginosa* that were surface-attached for 45 minutes. Only a fraction of the amoebae are calcein-AM fluorescent (green in merged image), indicating that virulence induction is heterogeneous during this attachment period. (B) Phase contrast and calcein-AM fluorescence images and host killing indexes for *P. aeruginosa* cells that were surface-attached for more than 1 hour, treated with gentamycin, and mixed with amoebae, indicating that virulence is not inhibited by protein synthesis after it has been induced. Scale bars represent 50  $\mu\text{m}$ . Bars represent the average of three independent experiments and error bars indicate standard deviation.

**Figure S5**

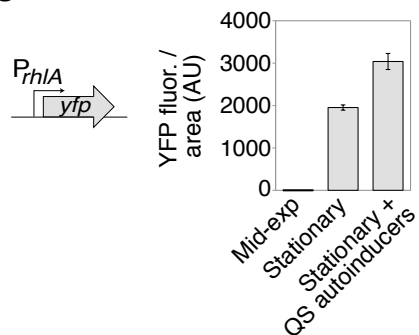

**Figure S5. Hyper-activation of quorum sensing in planktonic cells.** Fluorescence intensities of *P. aeruginosa* cells that contain a transcriptional fusion of the *rhIA* promoter to the gene encoding yellow fluorescent protein (YFP). The expression of YFP was measured in planktonic *P. aeruginosa* cells from mid-exponential or stationary phase cultures supplemented with either DMSO or 5  $\mu$ M 3OC12-HSL and 10  $\mu$ M C4-HSL. Bars represent the average of three independent experiments and error bars indicate standard deviation.

**Figure S6**

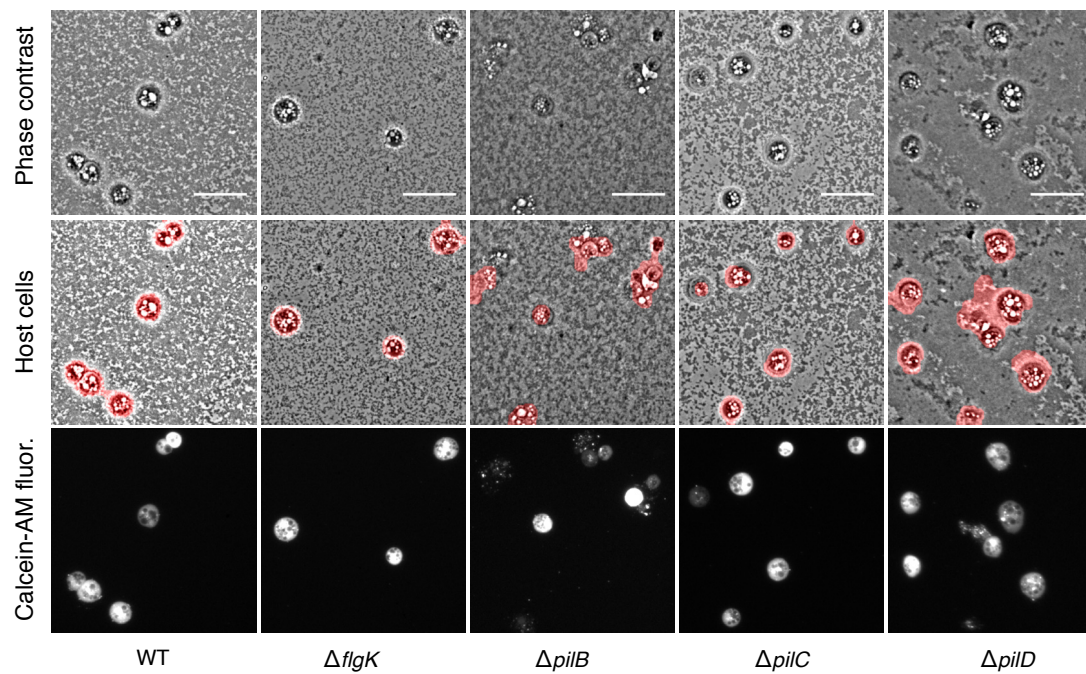

**Figure S6. Virulence of surface-attached flagella and pilus mutants toward amoebae.** Phase contrast, host-cell mask overlays (red), and calcein-AM fluorescence images of surface-attached wildtype,  $\Delta flgK$ ,  $\Delta pilB$ ,  $\Delta pilC$ , or  $\Delta pilD$  *P. aeruginosa* cells that have been mixed with amoebae. The scale bar represents 50  $\mu$ m.

**Figure S7**

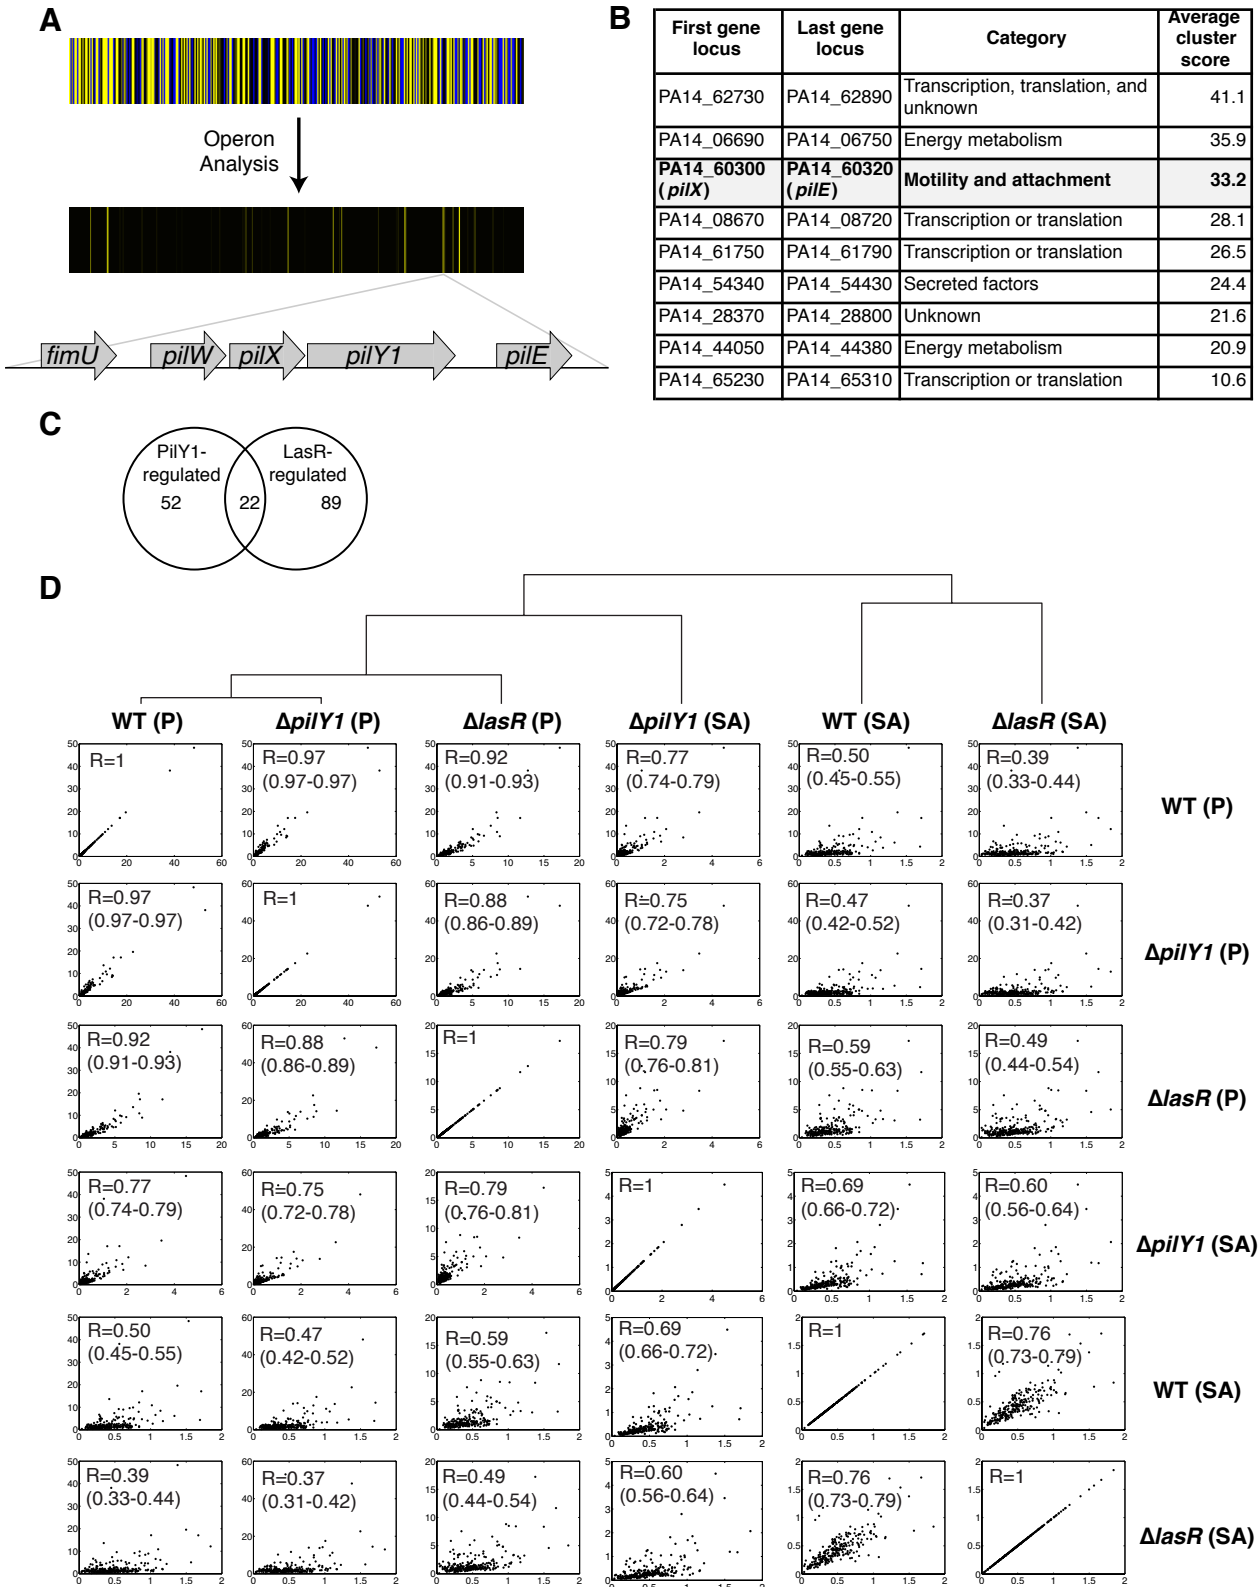

**Figure S7. PilY1 mediates a transcriptional surface-attachment response.** (A) Transcriptional profiling and operon analysis for the identification of operons activated by surface attachment. Microarray indicates expression of genes that are decreased (blue) or increased (yellow) by surface attachment. Operon analysis was performed to identify gene expression changes in operons, as described in the Materials and Methods. (B) The scores of the nine highest gene cluster expression changes are listed. (C) Diagram indicating the number of genes in surface-attached cells regulated at least 3-fold by PilY1, LasR, or by both. The genes regulated by PilY1 or LasR are shown in Tables S2 and S3, respectively. (D) Hierarchical clustering, correlation plots, and Pearson correlation coefficients for transcriptional profiles from microarrays for surface-attached (SA) or planktonic (P) sub-populations of wildtype,  $\Delta lasR$ , and  $\Delta pilY1$  cells for genes that are activated by at least 4-fold by surface attachment in overnight cultures. Axes of the correlation plots indicate fold upregulation compared against a common mixed reference. The 68% confidence interval ranges for each correlation coefficient are given in parentheses.



**Figure S8**

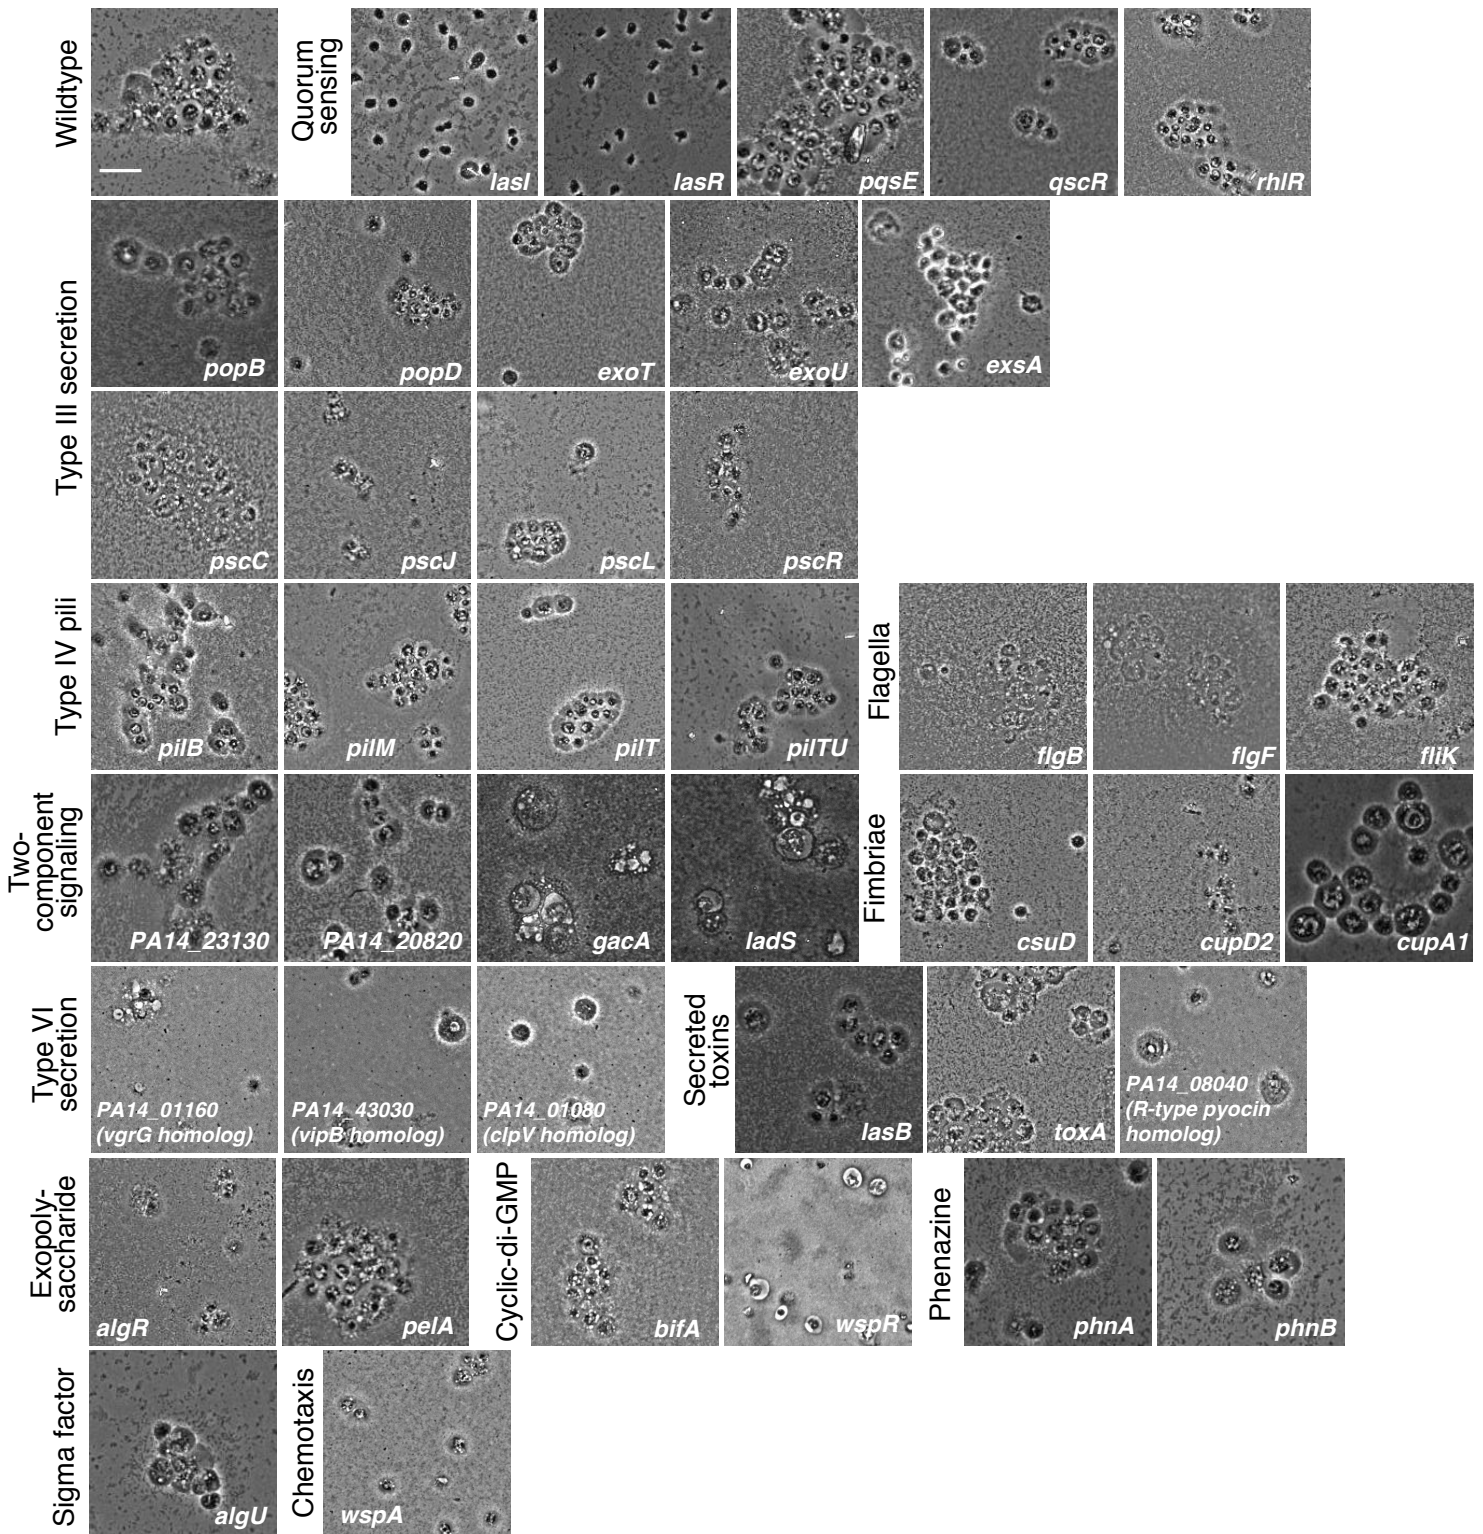

**Figure S8. Targeted screen for loss of surface-activated virulence.** Phase contrast images of amoebae that have been mixed with surface-associated wild-type or mutant *P. aeruginosa* strains. Cells round up when mixed with all mutants except for the LasR and LasI mutants. The scale bar for wildtype represents 50  $\mu$ m and the magnification for images of all the mutants matches that of wildtype.

**Figure S9**

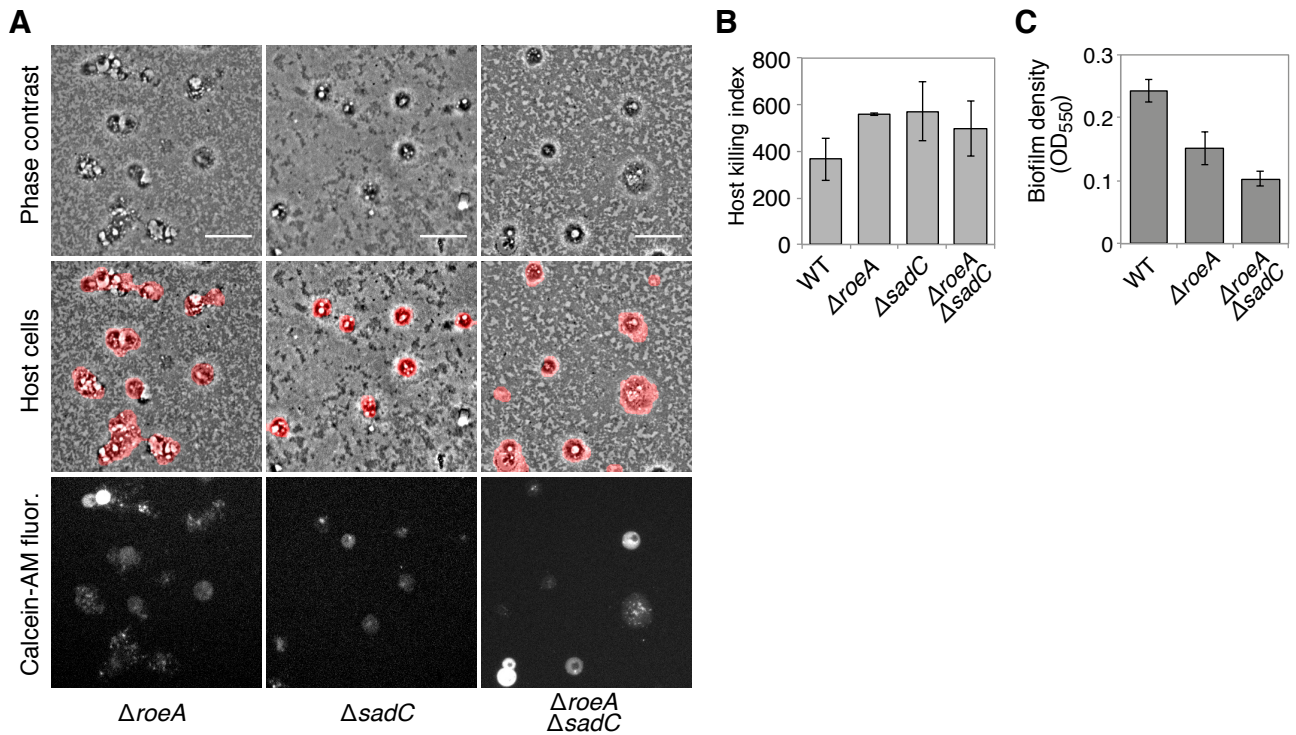

**Figure S9. Surface virulence and biofilm formation in c-di-GMP mutants.** (A) Phase contrast, host cell overlay (red), and calcein-AM images and (B) host killing indexes of surface-attached  $\Delta roeA$ ,  $\Delta sadC$ , or  $\Delta roeA \Delta sadC$  double deletion *P. aeruginosa* mutants. (C) The biofilm density of  $\Delta roeA$  and  $\Delta roeA \Delta sadC$  double deletion mutants, as measured by optical density at 550 nm of crystal violet stained surface-attached cells. Bars represent the average of three independent experiments and error bars indicate standard deviation.

**Figure S10**

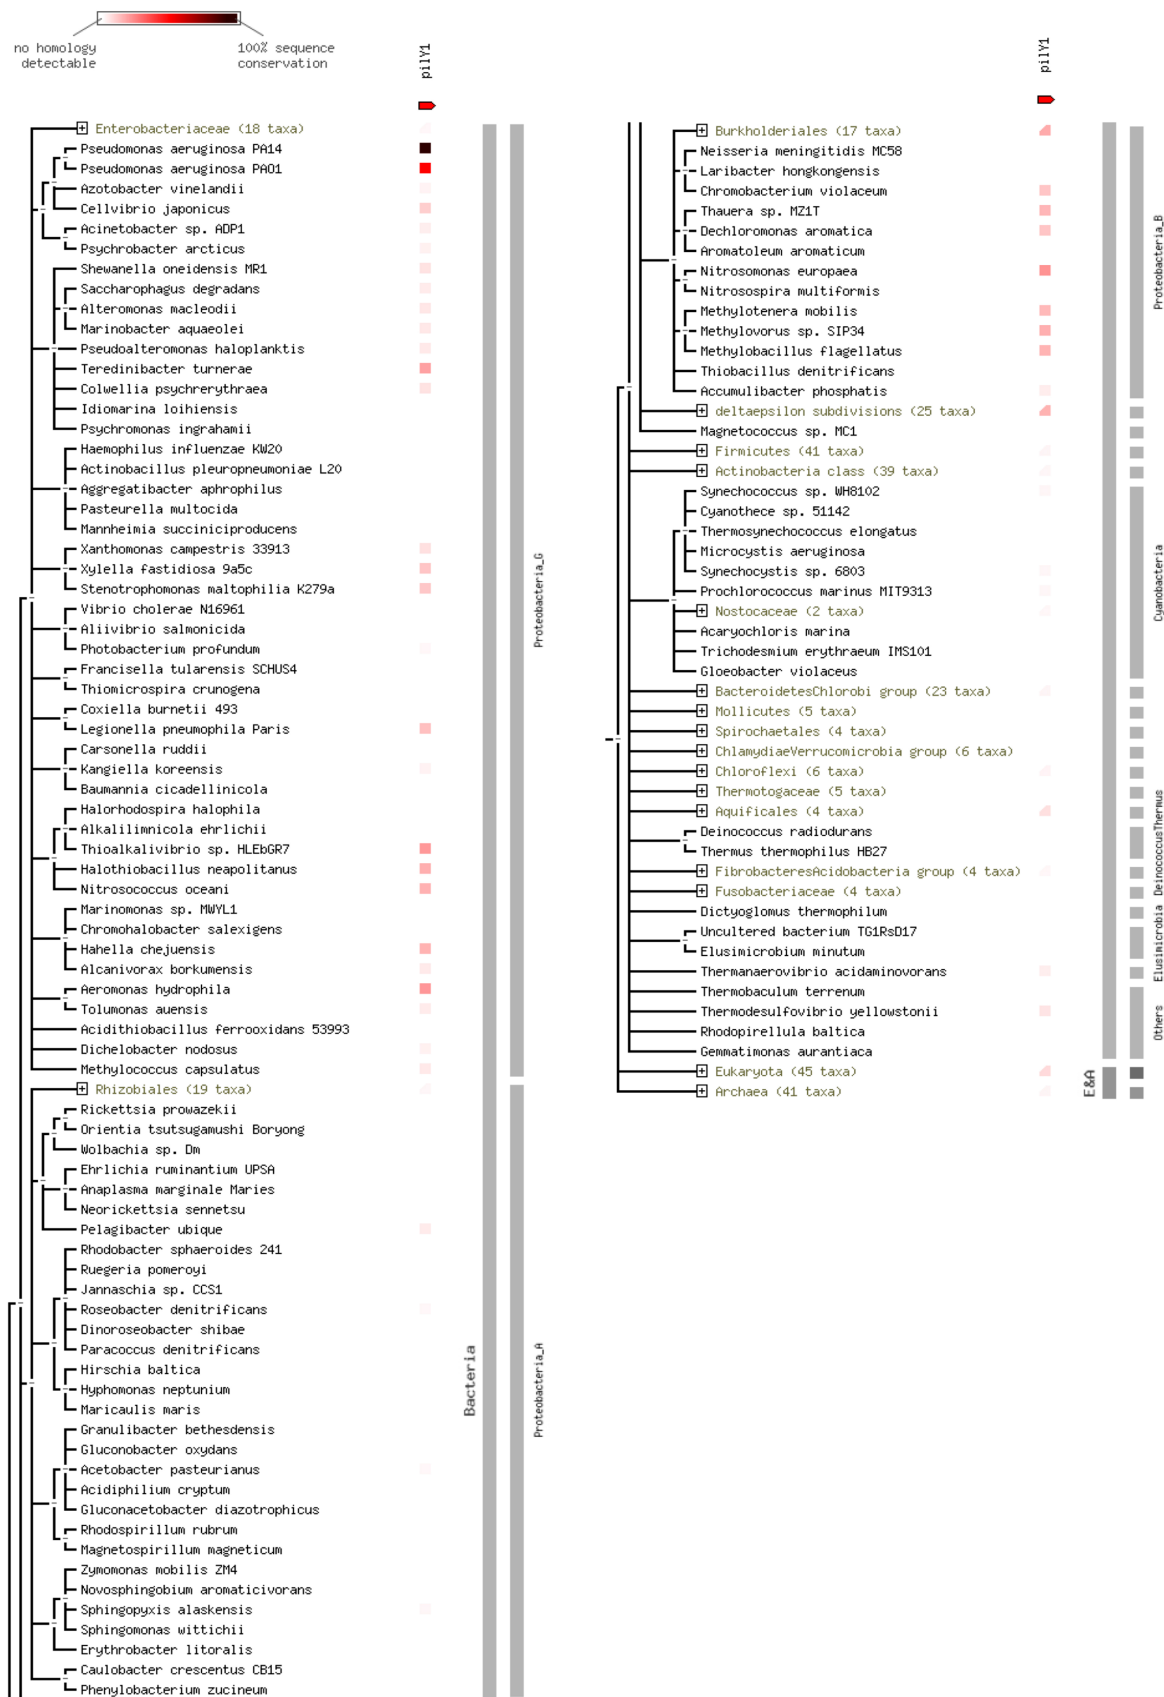

**Figure S10. The occurrence of PiiY1 among bacteria, eukaryotes and archaea.** The sequence similarity to *P. aeruginosa* PiiY1 is indicated by a continuous scale indicating no homology (white), intermediate sequence conservation (red) and strong sequence conservation (black). The table was produced using the STRING database (24) version 9.1.



**Table S2**

| Gene locus | Name         | Description                                             | Ratio  |
|------------|--------------|---------------------------------------------------------|--------|
| PA14_60290 | <i>pilW</i>  | type 4 fimbrial biogenesis protein PilW                 | +212.7 |
| PA14_60300 | <i>pilX</i>  | type 4 fimbrial biogenesis protein PilX                 | +109.1 |
| PA14_60280 | <i>fimU</i>  | type 4 fimbrial biogenesis protein FimU                 | +104.9 |
| PA14_60320 | <i>pilE</i>  | type 4 fimbrial biogenesis protein PilE                 | +37.7  |
| PA14_18020 |              | PhzF family phenazine biosynthesis protein              | +20.9  |
| PA14_54490 |              | hypothetical protein                                    | +17.7  |
| PA14_43310 |              | hypothetical protein                                    | +16.9  |
| PA14_69480 | <i>algZ</i>  | alginate biosynthesis protein AlgZ/FimS                 | +10.5  |
| PA14_18040 |              | hypothetical protein                                    | +7.0   |
| PA14_62190 |              | hypothetical protein                                    | +6.0   |
| PA14_68300 | <i>arcD</i>  | arginine/ornithine antiporter                           | +5.5   |
| PA14_69470 | <i>algR</i>  | alginate biosynthesis regulatory protein AlgR           | +5.2   |
| PA14_51480 |              | hypothetical protein                                    | +5.2   |
| PA14_48870 |              | C32 tRNA thiolase                                       | +5.1   |
| PA14_05110 |              | hypothetical protein                                    | +5.0   |
| PA14_46990 |              | two-component response regulator                        | +4.9   |
| PA14_22620 | <i>cyaB</i>  | hypothetical protein                                    | +4.9   |
| PA14_11250 |              | hypothetical protein                                    | +4.8   |
| PA14_48860 |              | hypothetical protein                                    | +4.6   |
| PA14_22250 |              | hypothetical protein                                    | +4.4   |
| PA14_11670 |              | hypothetical protein                                    | +4.3   |
| PA14_54800 |              | pseudouridylate synthase                                | +4.3   |
| PA14_70570 | <i>recG</i>  | ATP-dependent DNA helicase RecG                         | +4.3   |
| PA14_11660 | <i>aqpZ</i>  | aquaporin Z                                             | +4.1   |
| PA14_11260 |              | epimerase                                               | +3.7   |
| PA14_59790 | <i>pvrR</i>  | two component response regulator                        | +3.6   |
| PA14_62180 |              | hypothetical protein                                    | +3.6   |
| PA14_17120 | <i>cdsA</i>  | phosphatidate cytidyltransferase                        | +3.2   |
| PA14_71880 |              | hypothetical protein                                    | +3.2   |
| PA14_46160 |              | hypothetical protein                                    | +3.2   |
| PA14_67300 |              | ABC transporter substrate-binding protein               | +3.1   |
| PA14_72090 |              | hypothetical protein                                    | +3.1   |
| PA14_11270 | <i>oprG</i>  | outer membrane protein OprG precursor                   | +3.1   |
| PA14_64060 |              | chemotaxis transducer                                   | +3.0   |
| PA14_22880 |              | Fe-S protein                                            | +3.0   |
| PA14_72260 |              | hypothetical protein                                    | +3.0   |
| PA14_00640 | <i>phzH</i>  | potential phenazine-modifying enzyme                    | -3.0   |
| PA14_06160 |              | hydroxamate-type ferrisiderophore receptor              | -3.1   |
| PA14_45940 | <i>lasI</i>  | autoinducer synthesis protein LasI                      | -3.2   |
| PA14_33590 |              | hypothetical protein                                    | -3.2   |
| PA14_11010 |              | hypothetical protein                                    | -3.2   |
| PA14_33260 | <i>pvdS</i>  | extracytoplasmic-function sigma-70 factor               | -3.2   |
| PA14_55160 | <i>toxR</i>  | transcriptional regulator ToxR                          | -3.3   |
| PA14_09270 | <i>pchE</i>  | dihydroaeruginic acid synthetase                        | -3.3   |
| PA14_37745 |              | carbamoyl transferase                                   | -3.6   |
| PA14_09210 | <i>pchA</i>  | salicylate biosynthesis isochorismate synthase          | -3.6   |
| PA14_13130 |              | hypothetical protein                                    | -3.7   |
| PA14_24650 | <i>rnfI</i>  | ribosome modulation factor                              | -3.8   |
| PA14_09900 | <i>prpL</i>  | Pvds-regulated endoprotease, lysyl class                | -3.8   |
| PA14_31170 |              | hypothetical protein                                    | -3.9   |
| PA14_39960 | <i>phzB2</i> | phenazine biosynthesis protein                          | -3.9   |
| PA14_10240 |              | branched-chain alpha-keto acid dehydrogenase subunit E2 | -3.9   |
| PA14_56830 | <i>icmP</i>  | metalloproteinase outer membrane                        | -3.9   |
| PA14_58730 | <i>pilA</i>  | type IV pilin structural subunit                        | -4.1   |
| PA14_39250 |              | double-glycine peptidase                                | -4.5   |
| PA14_62790 |              | tRNA-Met                                                | -4.5   |
| PA14_11600 |              | ABC transporter                                         | -4.7   |
| PA14_39970 | <i>phzA2</i> | phenazine biosynthesis protein                          | -4.7   |
| PA14_52320 |              | tRNA-Met                                                | -4.9   |
| PA14_13140 |              | hypothetical protein                                    | -5.3   |
| PA14_33050 |              | hypothetical protein                                    | -5.5   |
| PA14_39240 |              | hypothetical protein                                    | -5.6   |
| PA14_10260 |              | dehydrogenase E1 component                              | -5.7   |
| PA14_10370 |              | hypothetical protein                                    | -5.9   |
| PA14_10350 |              | secretion protein                                       | -6.5   |
| PA14_06180 |              | RNA polymerase sigma factor                             | -6.7   |
| PA14_39230 |              | hypothetical protein                                    | -6.9   |
| PA14_10330 |              | outer membrane protein                                  | -7.4   |
| PA14_20500 |              | tRNA-Arg                                                | -7.4   |
| PA14_60310 | <i>pilY1</i> | type 4 fimbrial biogenesis protein PilY1                | -7.9   |
| PA14_10230 | <i>adh</i>   | 2,3-butanediol dehydrogenase                            | -8.1   |
| PA14_10360 |              | hypothetical protein                                    | -12.0  |
| PA14_49310 |              | hypothetical protein                                    | -23.0  |
| PA14_10380 |              | hypothetical protein                                    | -30.3  |

**Table S2. Genes that are regulated in surface-attached  $\Delta pilY1$  cells.** The ratio of gene expression in  $\Delta pilY1$  cells to that of wildtype cells is shown for all predicted genes that are regulated at least 3-fold in surface-attached cells from cultures that were grown overnight. The inverse of the ratio is shown for down-regulated genes and is indicated by a minus sign. Gene expression ratios are the average of three independent experiments.

Table S3

| Gene locus | Name         | Description                                              | Ratio | Gene locus | Name         | Description                                             | Ratio |
|------------|--------------|----------------------------------------------------------|-------|------------|--------------|---------------------------------------------------------|-------|
| PA14_22570 | <i>csaA</i>  | CsaA protein                                             | +16.0 | PA14_60450 | <i>rpmA</i>  | 50S ribosomal protein L27                               | -3.3  |
| PA14_51640 |              | hypothetical protein                                     | +9.7  | PA14_64840 |              | short-chain dehydrogenase                               | -3.4  |
| PA14_39230 |              | hypothetical protein                                     | +7.9  | PA14_23970 | <i>xcpQ</i>  | general secretion pathway protein D                     | -3.4  |
| PA14_15030 | <i>leuA</i>  | 2-isopropylmalate synthase                               | +7.0  | PA14_32150 | <i>antB</i>  | anthranilate dioxygenase small subunit                  | -3.5  |
| PA14_60140 |              | xerD-like integrase                                      | +6.9  | PA14_31170 |              | hypothetical protein                                    | -3.5  |
| PA14_23750 | <i>leuC</i>  | isopropylmalate isomerase large subunit                  | +6.8  | PA14_43680 | <i>fabA</i>  | 3-hydroxydecanoyl-ACP dehydratase                       | -3.6  |
| PA14_23760 | <i>leuD</i>  | isopropylmalate isomerase small subunit                  | +6.4  | PA14_44520 |              | drug efflux transporter                                 | -3.6  |
| PA14_39240 |              | hypothetical protein                                     | +6.1  | PA14_67440 |              | N-formimino-L-glutamate deiminase                       | -3.6  |
| PA14_38310 |              | hypothetical protein                                     | +5.5  | PA14_38270 |              | hypothetical protein                                    | -3.7  |
| PA14_35500 | <i>bkdB</i>  | branched-chain alpha-keto acid dehydrogenase subunit E2  | +5.5  | PA14_18630 |              | serine protease                                         | -3.8  |
| PA14_11790 |              | amino acid transporter                                   | +5.4  | PA14_53840 |              | hypothetical protein                                    | -4.0  |
| PA14_19590 |              | molybdopterin-binding protein                            | +5.4  | PA14_50640 |              | hypothetical protein                                    | -4.0  |
| PA14_35530 | <i>bkdA1</i> | 2-oxoisovalerate dehydrogenase subunit alpha             | +5.1  | PA14_30720 |              | tRNA-Cys                                                | -4.2  |
| PA14_11770 | <i>eutB</i>  | ethanolamine ammonia-lyase large subunit                 | +5.0  | PA14_34800 |              | amino acid transporter LysE                             | -4.2  |
| PA14_38850 | <i>exaB</i>  | cytochrome c550                                          | +4.9  | PA14_59850 |              | hypothetical protein                                    | -4.2  |
| PA14_38460 | <i>gnyB</i>  | acyl-CoA carboxyltransferase subunit beta                | +4.7  | PA14_62790 |              | tRNA-Met                                                | -4.3  |
| PA14_31510 |              | short-chain dehydrogenase                                | +4.6  | PA14_23980 | <i>xcpP</i>  | secretion protein XcpP                                  | -4.4  |
| PA14_46910 |              | ABC transporter substrate-binding protein                | +4.5  | PA14_01490 |              | hemolysin                                               | -4.4  |
| PA14_27100 | <i>lipA</i>  | lactonizing lipase                                       | +4.4  | PA14_33290 |              | hypothetical protein                                    | -4.5  |
| PA14_34900 |              | oxidoreductase                                           | +4.3  | PA14_20500 |              | tRNA-Arg                                                | -4.5  |
| PA14_34880 |              | GntR family transcriptional regulator                    | +4.3  | PA14_30620 |              | AraC family transcriptional regulator                   | -4.6  |
| PA14_53940 | <i>prpB</i>  | 2-methylisocitrate lyase                                 | +4.3  | PA14_19120 | <i>rhIR</i>  | transcriptional regulator RhIR                          | -4.6  |
| PA14_29070 |              | hypothetical protein                                     | +4.2  | PA14_52320 |              | tRNA-Met                                                | -4.6  |
| PA14_53950 | <i>prpC</i>  | methylcitrate synthase                                   | +4.2  | PA14_05500 |              | hypothetical protein                                    | -4.7  |
| PA14_28130 |              | hypothetical protein                                     | +4.2  | PA14_10260 |              | dehydrogenase E1 component                              | -5.0  |
| PA14_51650 |              | integrase                                                | +4.2  | PA14_39960 | <i>phzB2</i> | phenazine biosynthesis protein                          | -5.0  |
| PA14_34920 |              | ferredoxin                                               | +4.1  | PA14_01780 |              | nucleoside 2-deoxyribosyltransferase                    | -5.0  |
| PA14_38440 | <i>gnyD</i>  | citronelloyl-CoA dehydrogenase, GnyD                     | +4.0  | PA14_30630 | <i>pqsH</i>  | FAD-dependent monooxygenase                             | -5.8  |
| PA14_19540 |              | hypothetical protein                                     | +3.9  | PA14_19100 | <i>rhlA</i>  | rhamnosyltransferase chain A                            | -5.8  |
| PA14_39270 |              | hypothetical protein                                     | +3.8  | PA14_37760 |              | MFS transporter                                         | -6.2  |
| PA14_46950 |              | ABC transporter ATP-binding protein                      | +3.7  | PA14_10240 |              | branched-chain alpha-keto acid dehydrogenase subunit E2 | -6.4  |
| PA14_21000 |              | hypothetical protein                                     | +3.7  | PA14_72060 |              | hypothetical protein                                    | -6.7  |
| PA14_00620 |              | hypothetical protein                                     | +3.6  | PA14_11600 |              | ABC transporter                                         | -6.7  |
| PA14_34940 |              | hypothetical protein                                     | +3.6  | PA14_37770 |              | hydrolase                                               | -6.8  |
| PA14_50530 | <i>braD</i>  | branched-chain amino acid transport protein BraD         | +3.6  | PA14_59840 |              | hypothetical protein                                    | -6.9  |
| PA14_23790 | <i>leuB</i>  | 3-isopropylmalate dehydrogenase                          | +3.5  | PA14_45950 | <i>rsaL</i>  | regulatory protein RsaL                                 | -7.0  |
| PA14_50520 | <i>braC</i>  | branched-chain amino acid transport protein BraC         | +3.5  | PA14_28360 |              | hypothetical protein                                    | -7.6  |
| PA14_19530 |              | NAD(P)H-dependent FMN reductase                          | +3.4  | PA14_53260 |              | hypothetical protein                                    | -7.6  |
| PA14_23030 | <i>oprB</i>  | glucose/carbohydrate outer membrane porin OprB precursor | +3.4  | PA14_10370 |              | hypothetical protein                                    | -9.7  |
| PA14_38800 | <i>pqqC</i>  | pyrroloquinoline quinone biosynthesis protein PqqC       | +3.4  | PA14_32160 | <i>antA</i>  | anthranilate dioxygenase large subunit                  | -10.3 |
| PA14_58990 |              | DNA helicase                                             | +3.4  | PA14_10350 |              | secretion protein                                       | -11.3 |
| PA14_38930 |              | transcriptional regulator                                | +3.4  | PA14_39970 | <i>phzA2</i> | phenazine biosynthesis protein                          | -12.0 |
| PA14_60130 |              | hypothetical protein                                     | +3.4  | PA14_18800 |              | hypothetical protein                                    | -13.7 |
| PA14_46030 |              | chemotaxis transducer                                    | +3.3  | PA14_45960 | <i>lasR</i>  | transcriptional regulator LasR                          | -14.1 |
| PA14_39260 |              | hypothetical protein                                     | +3.3  | PA14_37745 |              | carbamoyl transferase                                   | -15.2 |
| PA14_31540 |              | acyl-CoA dehydrogenase                                   | +3.3  | PA14_10330 |              | outer membrane protein                                  | -17.1 |
| PA14_38470 | <i>gnyH</i>  | gamma-carboxygeranyl-CoA hydratase                       | +3.2  | PA14_09900 | <i>prpL</i>  | Pvds-regulated endoprotease, lysyl class                | -20.4 |
| PA14_39220 |              | hypothetical protein                                     | +3.2  | PA14_16250 | <i>lasB</i>  | elastase LasB                                           | -26.9 |
| PA14_46970 | <i>ansB</i>  | glutaminase-asparaginase                                 | +3.2  | PA14_49310 |              | hypothetical protein                                    | -29.1 |
| PA14_39250 |              | double-glycine peptidase                                 | +3.1  | PA14_10360 |              | hypothetical protein                                    | -30.9 |
| PA14_35520 | <i>bkdA2</i> | 2-oxoisovalerate dehydrogenase subunit beta              | +3.1  | PA14_10230 | <i>adh</i>   | 2,3-butanediol dehydrogenase                            | -35.7 |
| PA14_33000 | <i>gcvP2</i> | glycine dehydrogenase                                    | +3.0  | PA14_10380 |              | hypothetical protein                                    | -96.6 |
| PA14_10700 |              | bacteriophytochrome                                      | -3.0  |            |              |                                                         |       |
| PA14_40300 |              | hypothetical protein                                     | -3.1  |            |              |                                                         |       |
| PA14_37790 | <i>pcoA</i>  | copper resistance protein A                              | -3.2  |            |              |                                                         |       |
| PA14_31160 |              | hypothetical protein                                     | -3.2  |            |              |                                                         |       |
| PA14_37780 |              | hypothetical protein                                     | -3.2  |            |              |                                                         |       |
| PA14_63170 |              | transcriptional regulator                                | -3.2  |            |              |                                                         |       |
| PA14_00640 | <i>phzH</i>  | potential phenazine-modifying enzyme                     | -3.3  |            |              |                                                         |       |

**Table S3. Genes that are regulated in surface-attached  $\Delta lasR$  cells.** The ratio of gene expression in  $\Delta lasR$  cells to that of wildtype is shown for all predicted genes that are regulated at least 3-fold in surface-attached cells from cultures that were grown overnight. The inverse of the ratio is shown for down-regulated genes and is indicated by a minus sign. Gene expression ratios are the average of three independent experiments.

**Table S4**

| Strain                                                                                                                                                                                                                                                                                                                                                                                                                                                                                                          | Description                                                                                                        | Reference                                 |
|-----------------------------------------------------------------------------------------------------------------------------------------------------------------------------------------------------------------------------------------------------------------------------------------------------------------------------------------------------------------------------------------------------------------------------------------------------------------------------------------------------------------|--------------------------------------------------------------------------------------------------------------------|-------------------------------------------|
| <b>D. discoideum strain</b>                                                                                                                                                                                                                                                                                                                                                                                                                                                                                     |                                                                                                                    |                                           |
| AX3                                                                                                                                                                                                                                                                                                                                                                                                                                                                                                             | NC-4 strain derivative capable of axenic growth                                                                    | (1), from E. C. Cox, Princeton University |
| <b>E. coli strain</b>                                                                                                                                                                                                                                                                                                                                                                                                                                                                                           |                                                                                                                    |                                           |
| B/r                                                                                                                                                                                                                                                                                                                                                                                                                                                                                                             | <i>E. coli</i> B strain with high UV resistance                                                                    | (2)                                       |
| <b>P. aeruginosa strains</b>                                                                                                                                                                                                                                                                                                                                                                                                                                                                                    |                                                                                                                    |                                           |
| PA14                                                                                                                                                                                                                                                                                                                                                                                                                                                                                                            | Wildtype                                                                                                           | (3)                                       |
| <i>bifA</i>                                                                                                                                                                                                                                                                                                                                                                                                                                                                                                     | PA14 $\Delta$ <i>bifA</i>                                                                                          | (4)                                       |
| <i>fimU</i>                                                                                                                                                                                                                                                                                                                                                                                                                                                                                                     | PA14 $\Delta$ <i>fimU</i>                                                                                          | (5)                                       |
| <i>flgK</i>                                                                                                                                                                                                                                                                                                                                                                                                                                                                                                     | PA14 <i>flgK</i> ::Tn5                                                                                             | (6)                                       |
| <i>lasR</i>                                                                                                                                                                                                                                                                                                                                                                                                                                                                                                     | PA14 $\Delta$ <i>lasR</i> :: <i>aacC1</i>                                                                          | (7)                                       |
| <i>lasR pilY1</i>                                                                                                                                                                                                                                                                                                                                                                                                                                                                                               | PA14 $\Delta$ <i>pilY1</i> $\Delta$ <i>lasR</i> :: <i>aacC1</i>                                                    | This study                                |
| <i>pelA</i>                                                                                                                                                                                                                                                                                                                                                                                                                                                                                                     | PA14 $\Delta$ <i>pelA</i>                                                                                          | (8)                                       |
| <i>pilC</i>                                                                                                                                                                                                                                                                                                                                                                                                                                                                                                     | PA14 <i>pilC</i> ::Tn5                                                                                             | (6)                                       |
| <i>pilD</i>                                                                                                                                                                                                                                                                                                                                                                                                                                                                                                     | PA14 $\Delta$ <i>pilD</i>                                                                                          | (5)                                       |
| <i>pilE</i>                                                                                                                                                                                                                                                                                                                                                                                                                                                                                                     | PA14 $\Delta$ <i>pilE</i>                                                                                          | (5)                                       |
| <i>pilTU</i>                                                                                                                                                                                                                                                                                                                                                                                                                                                                                                    | PA14 $\Delta$ <i>pilTU</i> :: <i>FRT</i>                                                                           | (9)                                       |
| <i>pilW</i>                                                                                                                                                                                                                                                                                                                                                                                                                                                                                                     | PA14 $\Delta$ <i>pilW</i>                                                                                          | (5)                                       |
| <i>pilX</i>                                                                                                                                                                                                                                                                                                                                                                                                                                                                                                     | PA14 $\Delta$ <i>pilX</i>                                                                                          | (5)                                       |
| <i>pilY1</i>                                                                                                                                                                                                                                                                                                                                                                                                                                                                                                    | PA14 $\Delta$ <i>pilY1</i>                                                                                         | (10)                                      |
| <i>roeA</i>                                                                                                                                                                                                                                                                                                                                                                                                                                                                                                     | PA14 $\Delta$ <i>roeA</i>                                                                                          | (11)                                      |
| <i>sadC</i>                                                                                                                                                                                                                                                                                                                                                                                                                                                                                                     | PA14 $\Delta$ <i>sadC</i>                                                                                          | (11)                                      |
| <i>roeA sadC</i>                                                                                                                                                                                                                                                                                                                                                                                                                                                                                                | PA14 $\Delta$ <i>roeA</i> $\Delta$ <i>sadC</i>                                                                     | (11)                                      |
| Single mutants of: <i>algU</i> , <i>algR</i> , <i>csuD</i> , <i>cupD2</i> , <i>exoT</i> , <i>exoU</i> , <i>exsA</i> , <i>flgF</i> , <i>fliK</i> , <i>gacA</i> , <i>ladS</i> , <i>lasB</i> , <i>lasI</i> , PA14_01160, PA14_43030, PA14_01080, PA14_08040, PA14_23130, PA14_20820, <i>phnA</i> , <i>phnB</i> , <i>pilB</i> , <i>pilM</i> , <i>pilT</i> , <i>popB</i> , <i>popD</i> , <i>pscC</i> , <i>pscJ</i> , <i>pscL</i> , <i>pscR</i> , <i>pqsE</i> , <i>qscR</i> , <i>toxA</i> , <i>wspA</i> , <i>wspR</i> | MAR2xT7 insertion into the specified gene in PA14                                                                  | (12)                                      |
| UTD5.2 ( <i>P<sub>rhIA</sub>-yfp</i> )                                                                                                                                                                                                                                                                                                                                                                                                                                                                          | PA14 <i>attB</i> ::[ <i>P<sub>rhIA</sub>-yfp</i> ] <i>glmS</i> ::[ <i>P<sub>rhIA</sub>-mCherry</i> ]               | This study                                |
| AFS56 (Empty vector)                                                                                                                                                                                                                                                                                                                                                                                                                                                                                            | PA14 $\Delta$ <i>pilY1</i> <i>glmS</i> ::[empty vector]                                                            | This study                                |
| AFS64 (PA14 GFP)                                                                                                                                                                                                                                                                                                                                                                                                                                                                                                | PA14 <i>glmS</i> ::[ <i>P<sub>A1,04,03</sub>-gfp</i> ]                                                             | This study                                |
| AFS72-1 (WT <i>PilY1</i> )                                                                                                                                                                                                                                                                                                                                                                                                                                                                                      | PA14 $\Delta$ <i>pilY1</i> <i>glmS</i> ::[ <i>P<sub>hbc</sub>-pilY1</i> -His]                                      | This study                                |
| AFS72-3 ( <i>PilY1</i> $\Delta$ SS)                                                                                                                                                                                                                                                                                                                                                                                                                                                                             | PA14 $\Delta$ <i>pilY1</i> <i>glmS</i> ::[ <i>P<sub>hbc</sub>-pilY1</i> -His $\Delta$ SS ( $\Delta$ (1-29))]       | This study                                |
| AFS72-4 ( <i>PilY1</i> $\Delta$ N-term)                                                                                                                                                                                                                                                                                                                                                                                                                                                                         | PA14 $\Delta$ <i>pilY1</i> <i>glmS</i> ::[ <i>P<sub>hbc</sub>-pilY1</i> -His $\Delta$ N-term ( $\Delta$ (30-584))] | This study                                |
| AFS72-5 ( <i>PilY1</i> $\Delta$ PilC)                                                                                                                                                                                                                                                                                                                                                                                                                                                                           | PA14 $\Delta$ <i>pilY1</i> <i>glmS</i> ::[ <i>P<sub>hbc</sub>-pilY1</i> -His $\Delta$ PilC ( $\Delta$ (589-999))]  | This study                                |
| AFS72-6 ( <i>PilY1</i> $\Delta$ VWFa)                                                                                                                                                                                                                                                                                                                                                                                                                                                                           | PA14 $\Delta$ <i>pilY1</i> <i>glmS</i> ::[ <i>P<sub>hbc</sub>-pilY1</i> -His $\Delta$ VWFa ( $\Delta$ (115-362))]  | This study                                |
| <b>M. musculus strain</b>                                                                                                                                                                                                                                                                                                                                                                                                                                                                                       |                                                                                                                    |                                           |
| J774A.1                                                                                                                                                                                                                                                                                                                                                                                                                                                                                                         | Macrophage cell line derived from a tumor in a female BALB/c mouse                                                 | (13)                                      |
| <b>Plasmid</b>                                                                                                                                                                                                                                                                                                                                                                                                                                                                                                  |                                                                                                                    |                                           |
| mini-CTX2                                                                                                                                                                                                                                                                                                                                                                                                                                                                                                       | Self-proficient integration vector containing <i>tet</i> , <i>int</i> , and <i>lacI<sup>f</sup></i>                | (14)                                      |
| pFLP2                                                                                                                                                                                                                                                                                                                                                                                                                                                                                                           | Plasmid expressing Flp to recombine FRT sites                                                                      | (15)                                      |
| pMQ80                                                                                                                                                                                                                                                                                                                                                                                                                                                                                                           | Shuttle vector for cloning in yeast and for arabinose-inducible gene expression                                    | (16)                                      |
| p <i>PilY1</i> -His                                                                                                                                                                                                                                                                                                                                                                                                                                                                                             | pMQ80-derived vector expressing <i>PilY1</i> -His                                                                  | (10)                                      |
| pSMC263 (p <i>PilY1</i> -His $\Delta$ SS)                                                                                                                                                                                                                                                                                                                                                                                                                                                                       | pMQ80-derived vector expressing <i>PilY1</i> -His $\Delta$ SS                                                      | (10)                                      |
| pSMC264 (p <i>PilY1</i> -His $\Delta$ N)                                                                                                                                                                                                                                                                                                                                                                                                                                                                        | pMQ80-derived vector expressing <i>PilY1</i> -His $\Delta$ N                                                       | (10)                                      |
| pSMC265 (p <i>PilY1</i> -His $\Delta$ PilC)                                                                                                                                                                                                                                                                                                                                                                                                                                                                     | pMQ80-derived vector expressing <i>PilY1</i> -His $\Delta$ PilC                                                    | (10)                                      |
| pSMC266 (p <i>PilY1</i> -His $\Delta$ VWFa)                                                                                                                                                                                                                                                                                                                                                                                                                                                                     | pMQ80-derived vector expressing <i>PilY1</i> -His $\Delta$ VWFa                                                    | (10)                                      |
| pSW(GFP-PilT)                                                                                                                                                                                                                                                                                                                                                                                                                                                                                                   | mini-CTX plasmid containing a GFP-PilT translational fusion under control of the <i>P<sub>BAD</sub></i> promoter   | (17)                                      |
| pTNS2                                                                                                                                                                                                                                                                                                                                                                                                                                                                                                           | Mini-Tn7 Integration helper plasmid containing <i>tnaA</i> , <i>B</i> , <i>C</i> and <i>D</i>                      | (18)                                      |
| pUC18-mini-Tn7T-Gm                                                                                                                                                                                                                                                                                                                                                                                                                                                                                              | Mini-Tn7 delivery vector                                                                                           | (18)                                      |
| pUC18-mini-Tn7-Lac                                                                                                                                                                                                                                                                                                                                                                                                                                                                                              | Mini-Tn7 delivery vector                                                                                           | (18)                                      |
| pUCP18-RedS                                                                                                                                                                                                                                                                                                                                                                                                                                                                                                     | $\lambda$ Red recombineering vector                                                                                | (19)                                      |

**Table S4.** Strains and plasmids used in this study. Details of strain and plasmid construction are described in the Supplemental Materials and Methods section.

## SUPPLEMENTAL MATERIALS AND METHODS

### Media

PS:DB medium consists of Development Buffer (DB) (5 mM  $\text{KH}_2\text{PO}_4$ , 5 mM  $\text{Na}_2\text{HPO}_4$ , 2 mM  $\text{MgCl}_2$ , 1 mM  $\text{CaCl}_2$ , pH 6.5) containing 10% (v/v) PS medium (10 g/L Special Peptone LP0072 (Oxoid, Hampshire, United Kingdom), 7 g/L Yeast Extract LP0021 (Oxoid, Hampshire, United Kingdom), 10 mM  $\text{KH}_2\text{PO}_4$ , 0.45 mM  $\text{Na}_2\text{HPO}_4$ , 1.5% (w/v) D-glucose, 30 nM Vitamin B12, 180 nM Folic acid, pH 6.5). GYP plates consist of 1 g/L D-glucose, 2 g/L Bacto Peptone, 0.25 g/L Yeast Extract, 31 mM  $\text{KH}_2\text{PO}_4$ , 19 mM  $\text{Na}_2\text{HPO}_4$ , 2.5% agar. PS:DPBS medium is a 1:9 mixture of PS and DPBS (Gibco, Grand Island, NY) supplemented with 1 mM  $\text{MgCl}_2$  and 1 mM  $\text{CaCl}_2$ .

To test for dependence of surface-activated virulence on protein synthesis and cell division, gentamycin at 100  $\mu\text{g}/\text{mL}$ , tetracycline at 200  $\mu\text{g}/\text{mL}$ , or fosfomycin at 100  $\mu\text{g}/\text{mL}$  were added 5.5 hours following dilution of cultures into petri dishes and allowed 6 hours of additional incubation with drugs with shaking at 37°C (Fig. 3C). To test the effect of gentamycin on the host cell killing process (Fig. S4 in Supplementary Information), gentamycin was added at 17 hours following dilution and given 3 hours of additional incubation with shaking at 37°C

For experiments in Supplementary Information Fig. S2B, calcein-AM was replaced in agar pads by 5  $\mu\text{M}$  Syto 9 (Invitrogen), 0.1 mM carboxy-difluorodihydrofluorescein diacetate (carboxy-H<sub>2</sub>DF-FDA) (Invitrogen) or by direct addition of 1 mM dichlorofluorescein diacetate (DC-FDA) (Sigma-Aldrich, St. Louis, MO) to the amoebae culture.

### Strain construction

A strain that constitutively expresses GFP was constructed by amplifying the hybrid sequence corresponding to the -51 to 0 region of  $P_{A1/04}$  (20) and the +1 to +28 region of  $P_{A1/03}$  (20) (herein referred to as the  $P_{A1/04/03}$  promoter) from a PA14-derived strain (gift of Kolter lab). The promoter sequence was joined with the sequence encoding mCherry using overlap extension, cloned into the KpnI and HindIII sites in the plasmid pUC18-mini-Tn7T-Gm (18), and integrated into the chromosome of PA14 using pTNS2 (18). The sequence encoding mCherry was replaced with that of GFP by flipping out the drug resistance marker of the chromosomal integration with pFLP2 and electroporating a PCR product containing the sequence that encodes GFP and a drug resistance marker using the  $\lambda$  Red recombination plasmid pUCP18-RedS (19), producing AFS64.

The  $\Delta lasR::aacC1$  allele was moved into the  $\Delta pilY1$  strain using  $\lambda$  Red recombination as described previously (19). To construct a strain that expresses a transcriptional fusion of the *rhlA* promoter to the gene encoding yellow fluorescent protein (YFP), the region encoding  $P_{rhlA}$ -*yfp* was cloned into the mini-CTX2 plasmid using overlap extension and integrated into the chromosome of a strain that constitutively expresses mCherry under the control of the *tetA* promoter, yielding UTD5.2.

The regions encoding wildtype PilY1-His, or the  $\Delta SS$ ,  $\Delta N$ -term,  $\Delta PilC$ , and  $\Delta VWFa$  mutant versions of PilY1-His were amplified from pPilY1-His, pSMC263, pSMC264, pSMC265, pSMC266, respectively, using the upper primer 5'-CATAACTAGTTGGAGCCAGCGCATGATCCACCAGATTACCCG-3' (or 5'-CATAACTAGTTGGAGCCAGCGCATGATCGCCACGGCCCTGAATG-3' to amplify pSMC263) and lower primer 5'-CATACCCGGGAAGAGCTGTGGCGAGAAGAC-3', cloned into the SpeI and XmaI sites in the mini-Tn7 delivery vector pUC18-miniTn7-Lac, and integrated into the  $\Delta pilY1$  strain by co-transforming with pTNS2, resulting in AFS72-1, AFS72-3, AFS72-4, AFS72-5, and AFS72-6, respectively. Sequencing revealed that the plasmid containing the  $\Delta VWFa$  deletion



also contains a point mutation in the PilC domain at G677D. The plasmid pUC18-miniTn7-Lac was co-transformed with pTNS2 into the  $\Delta pilY1$  strain, yielding the empty vector strain AFS56.

### **Phase contrast and fluorescence microscopy**

Imaging was performed using a Nikon Ti-E microscope (Nikon, Melville, NY), a 10X Plan Fluor Ph1 Nikon objective (0.3 NA), a 20X Super Plan Fluor Ph1 Nikon objective (0.45 NA) or 100X Plan Apo VC Nikon objective (1.4 NA), a Prior Lumen 200 Pro, and an Andor Clara camera, an Andor iXon DU-897 EMCCD, a Hamamatsu Orca-R2 (Hamamatsu, Bridgewater, NJ) camera, or a QImaging Rolera-XR (QImaging, Surrey, Canada BC) camera. DAPI, Calcein-AM, or propidium iodide/mCherry fluorescence were imaged using the 89014 filter set (Chroma, Bellows Falls, VT). The ET402/15x excitation and the ET455/50m emission filters were used to image DAPI fluorescence. The ET490/20x excitation and the ET535/50m emission filters were used to image Calcein-AM fluorescence. The ET572/35x excitation and the ET632/60m emission filters were used to image propidium iodide/mCherry fluorescence. CFP or YFP fluorescence was imaged using the 89002 filter set (Chroma) and ET430/24x excitation and the ET470/24m emission filters or the ET500/20x excitation and ET535/30m emission filters, respectively.

### **Amoeba cell viability assay**

*Dictyostelium discoideum* AX3 cells were inoculated from frozen stocks into an overnight LB culture of *E. coli* B/r. The mixture was plated on GYP plates and incubated for 4-6 days at 22°C until *D. discoideum* spores formed. Individual spores were picked, inoculated into PS medium supplemented with Antibiotic-Antimycotic solution (GIBCO, Grand Island, NY) that was diluted to 1/4 of the working concentration, and grown axenically at 22°C to an optical density measured at 600 nm ( $OD_{600}$ ) of 0.2 to 0.5, at which time *D. discoideum* cells were mixed with *P. aeruginosa* for host killing assays.

Agar pads were prepared by pouring molten 1% (w/v) Bacto Agar (BD Bioscience, San Jose, CA) in DB buffer and containing 1  $\mu$ M Calcein-AM (Invitrogen, Grand Island, NY) on top of a glass surface and cutting the pad into individual 1.5 cm x 1.5 cm sections. *P. aeruginosa* cultures were picked from individual colonies on agar plates and grown overnight from 37°C to saturation, diluted 1:100 or 1:1000 into PS:DB, and shaken in petri dishes on a benchtop rotator at 100 rpm at 37°C. Surface-attached cells were isolated by removing all the liquid medium from petri dishes and rinsing with DB buffer. Planktonic cells were isolated by transferring 10  $\mu$ L of culture from petri dishes to a clean petri dish. Pre-conditioned media was isolated by centrifuging cultures at 13 k x g and filtering the supernatant with a 0.2  $\mu$ m filter. 10  $\mu$ L of amoebae were added to surface-attached or planktonic cells, confined to the same plane as *P. aeruginosa* by placing an agar pad on top, and imaged using fluorescence microscopy (details in Supplementary Information). Attachment to chemically distinct surfaces was performed by first pouring molten agar or polyacrylamide into petri dishes and soaking overnight in water, and inoculating cultures as described above. Attachment to glass or plant leaf surfaces was performed by adding a glass coverslip or live *Epipremnum aureum* plant leaf mounted on a glass coverslip (details in Supplementary Information), respectively, to cultures that were shaken in petri dishes.

Images were analyzed using software written in Matlab (Mathworks, Natick, MA) that was modified from (21). An edge detection algorithm was applied to phase contrast images to construct masks of amoebae and isolate the fluorescence of individual cells (Fig. S1). The average calcein-AM intensity for each amoeba was computed by integrating the calcein-AM fluorescence intensities over the entire cell and dividing by the cell size. The host cell killing

index was computed as the average of the calcein-AM intensities of at least 100 amoebae in experiments that were performed in triplicate unless otherwise noted.

### **Macrophage cell death assay**

Cells from the mouse macrophage line J774A.1 (TIB-67 (authenticated by Cytochrome Oxidase I testing and verified to be mycoplasma free), ATCC, Manassas, VA) were grown at 37°C with 5% CO<sub>2</sub> in DMEM (with 4.5 g/L D-Glucose, and L-Glutamine) (Gibco) with 10% fetal bovine serum and Penicillin-Streptomycin solution (Invitrogen, Grand Island, NY). Cells were passed by scraping cells from the surface when confluence reached 70-90%.

*P. aeruginosa* cultures were grown in PS:DPBS (recipe in Supplementary Information) overnight on a benchtop rotator at 100 rpm at 37°C in polystyrene multi-well culture plates in which the bottom was lined with 1% agar made with PS:DPBS medium. Planktonic cells were taken from liquid portion of the culture. Surface-attached cells were isolated by removing the liquid portion, washing with DPBS, and cutting a slice of the agar pad from the bottom of the well. Propidium iodide was added at 1 µg/mL (accounting for the volume of the agar pad) and the pad was inverted and placed on top of macrophages that had been cultured in separate culture plates. Time-lapse imaging was performed at room temperature and approximately 250 cells were analyzed for experiments that were repeated in duplicate.

### **Surface cell density, cell number, MOI**

The density of *P. aeruginosa* cells on surfaces was measured from amoebae cell viability assay images that were acquired using a 10X or 20X objective. The IJ\_Isodata algorithm (ImageJ 1.44o) was applied to phase contrast images to construct cell boundary masks. The cell density was computed by dividing the area above the threshold in the mask by the total area. To determine the relationship between the cell density and the number of cells, planktonic *P. aeruginosa* cells were prepared as described in the amoebae viability assay except that no amoebae cells were added. Phase contrast and GFP fluorescence images of *P. aeruginosa* cells (strain AFS64) of the same imaging field were acquired using both 20X and 100X objectives. Cell density was measured as described above from phase contrast images acquired with the 20X objective. The number of cells was measured from phase contrast and GFP fluorescence images acquired using the 100X objective. Fluorescence was quantified using our own software written in Matlab modified from (21). The number of cells was computed by dividing the total cell fluorescence by the fluorescence of a single cell.

The multiplicity of infection (MOI) for planktonic cells for experiments was increased by concentrating cells from liquid cultures by centrifugation at 8 k x g. Cells in all virulence assays were kept at room temperature and imaged using phase contrast and fluorescence techniques typically 1 to 2 hours after the agar pad was added.

### **Plant surface attachment virulence assay**

Saturated *P. aeruginosa* PS:DB cultures were diluted 1:1000 into petri dishes and grown to an OD<sub>600</sub> of 0.3. Live *Epipremnum aureum* plant leaves were cut in 1.5 x 1.5 cm squares, mounted onto slides using molten valap (vaseline/lanolin/paraffin mixture), and added to the bottom of petri dishes containing *P. aeruginosa* cultures. Cultures were shaken at 100 rpm at 37°C until they reached an OD<sub>600</sub> of 0.9, at which time the plant sections were removed and rinsed with DB to remove unattached cells. Axenically growing amoebae in PS medium were supplemented with 0.04 µm orange fluorescent (540/560) FluoSpheres (Invitrogen/Life Technologies) and shaken at 22°C for 1 hour before use. The virulence of plant surface attached *P. aeruginosa* was assayed by adding amoebae to the surface of the plant leaf, and immobilizing cells using a 1% agar pad containing 5 mM Calcein-AM Violet (Invitrogen/Life

Technologies). The virulence of planktonic *P. aeruginosa* cells was assayed on leaves by mixing amoebae with planktonic cells, adding the mixture to leaves that were mounted on slides but not placed in cultures, and immobilizing cells on the leaf surface with the agar pad. Amoebae cell bodies were imaged using a YFP filter and Calcein-AM Violet fluorescence was imaged using a CFP filter (Fig. 2C). Amoeba host killing indexes were computed as described above for experiments repeated in biological triplicate. Amoebae and plant surface-attached *P. aeruginosa* were imaged together (Fig. 2B) by adding a mixture of amoebae that had been grown with orange FluoSpheres and *P. aeruginosa* that had been labeled with AlexaFluor 488 carboxylic acid, succinimidyl ester (Invitrogen/Life Technologies) to a mounted plant leaf. The sample was imaged using DAPI (for plant surface autofluorescence), mCherry (for amoebae containing beads), and GFP (for *P. aeruginosa*) filters. Images from different z-planes were assembled by identifying the regions in focus in each plane using the Canny detection algorithm and combining in-focus regions from different z-planes into a single image using our own software written in Matlab.

### **Hyper-stimulation of quorum sensing**

*P. aeruginosa* cells were inoculated into LB, grown overnight to saturation, diluted 1:1000 into PS:DB supplemented with DMSO or 5  $\mu$ M 3OC12-HSL (22) and 10  $\mu$ M C4-HSL (23), and either grown to mid-exponential phase and harvested or grown in petri dishes for 16 hours, at which time planktonic and surface-attached cells were isolated for fluorescence measurements and assayed for virulence towards amoebae. Cells containing a  $P_{rhlA}$ -*yfp* transcriptional reporter (UTD5.2) were imaged using single-cell fluorescence techniques by immobilizing cells on agarose pads as described previously (21).

### **Biofilm density quantification**

The density of biofilms in polystyrene petri dishes was measured by staining dishes with crystal violet, washing with water and transferring the stain to a cuvette using 95% ethanol. The absorbance at 550 nm was measured using a spectrophotometer.

### **RNA isolation and microarray analysis**

*P. aeruginosa* cells were inoculated into LB, grown overnight to saturation and diluted 1:1000 into PS:DB medium. Cultures were grown overnight in petri dishes shaken at 100 rpm and harvested for RNA. Planktonic cells were isolated from the liquid medium, pelleted and snap frozen over liquid nitrogen. Surface-attached cells were isolated by washing petri dishes with DB to remove unattached cells, treating with DB supplemented with approximately 100  $\mu$ g/mL of alginate lyase (Sigma-Aldrich, St. Louis, MO), and removing cells from the surface using a cell scraper (Fisher Scientific, Pittsburgh, PA). Cells were pelleted and snap frozen over liquid nitrogen. To create a mixed reference, a portion of all harvested cells were mixed together. Total RNA was prepared using the RNeasy Mini Kit (Qiagen, Valencia, CA), treated with RNase-Free DNaseI (Ambion/Life Technologies, Grand Island, NY), and re-purified using the RNeasy Mini Kit (Qiagen). To characterize the transcriptional response to 1 hour of surface attachment, PS:DB cultures were grown to an OD<sub>600</sub> of 0.9, transferred to a petri dish containing a glass surface, and shaken at 100 rpm for 1 hour. Planktonic and surface-attached populations were harvested for RNA instead using a lysozyme solution with 1% SDS and hot phenol extraction. For all microarray experiments, complementary DNA (cDNA) libraries containing Cy3- or Cy5- labeled dUTP (Enzo Life Sciences) were synthesized from the purified RNA using SuperScript III Reverse Transcriptase (Invitrogen/Life Technologies, Grand Island, NY). RNA was degraded by adding sodium hydroxide and the reaction was subsequently neutralized by addition of hydrochloric acid. The library was purified using the PCR Purification Kit (Qiagen)

and measured for Cy3 and Cy5 incorporation using a Nanodrop ND-1000 Spectrophotometer (Nanodrop Technologies, Wilmington, DE). Experimental libraries were normalized for cDNA concentration, combined with mixed reference libraries, and hybridized to customized Agilent microarrays (designs 28678 or 43307, Agilent Technologies, Santa Clara, CA) using the Agilent Gene Expression Hybridization Kit. Microarrays were designed using the Agilent eArray tool (<https://earray.chem.agilent.com/earray/>) and contain on average 2 probes per gene. Samples were hybridized for 17 hours at 65°C with continuous rotation at 10 rpm. Microarrays were scanned using an Agilent G2505B scanner and analyzed using Agilent Feature Extract software versions 9.5 and 11. Resulting microarray intensity data were submitted to the PUMA Database ([https://puma.princeton.edu/cgi-bin/publication/viewPublication.pl?pub\\_no=561](https://puma.princeton.edu/cgi-bin/publication/viewPublication.pl?pub_no=561)) for archiving. Operon analysis was performed by sorting microarray data by gene locus and applying the metric  $c \prod_{j=-2}^1 I_j$  at each gene locus, where  $I = \log_{10} \left( \frac{R_{SA}}{R_{Planktonic}} \right)$ ,  $c$  is a fixed scaling factor,  $j$  denotes the relative position from each locus, and  $R$  is the  $\log_{10}$  of the ratio of the expression of the experimental group (surface-attached or planktonic) to that of the mixed reference. The resulting scores were averaged and sorted, producing a list of genes ranked by gene cluster score (Fig. S7B). The linear correlation between expression profiles (Fig. S7D) was determined by computing the Pearson correlation coefficient for genes that are activated by surface attachment. A threshold of 4-fold activation was imposed in order to reduce the contribution of noise on the correlation coefficient while allowing for sufficient gene sampling ( $N > 250$ ). A 68% confidence interval for each correlation coefficient was computed using Fisher's r-to-z transformation, for which the standard error was computed using  $\sigma_z = 1/\sqrt{N-3}$ , where  $N$  is the number of genes used for the correlation. A hierarchical clustering tree was constructed in Matlab using the shortest distance linkage method and the Pearson correlation metric.

## SUPPLEMENTAL REFERENCES

1. Loomis WF, Jr. (1971) Sensitivity of *Dictyostelium discoideum* to nucleic acid analogues. *Experimental cell research* 64(2):484-486.
2. Witkin EM (1946) Inherited Differences in Sensitivity to Radiation in *Escherichia Coli*. *Proceedings of the National Academy of Sciences of the United States of America* 32(3):59-68.
3. Rahme LG, *et al.* (1995) Common virulence factors for bacterial pathogenicity in plants and animals. *Science* 268(5219):1899-1902.
4. Kuchma SL, *et al.* (2007) BifA, a cyclic-Di-GMP phosphodiesterase, inversely regulates biofilm formation and swarming motility by *Pseudomonas aeruginosa* PA14. *J Bacteriol* 189(22):8165-8178.
5. Kuchma SL, Griffin EF, & O'Toole GA (2012) Minor pilins of the type IV pilus system participate in the negative regulation of swarming motility. *J Bacteriol* 194(19):5388-5403.
6. O'Toole GA & Kolter R (1998) Flagellar and twitching motility are necessary for *Pseudomonas aeruginosa* biofilm development. *Mol Microbiol* 30(2):295-304.
7. O'Loughlin CT, *et al.* (2013) A quorum-sensing inhibitor blocks *Pseudomonas aeruginosa* virulence and biofilm formation. *PNAS* 110(44):17981-17986.
8. Friedman L & Kolter R (2004) Genes involved in matrix formation in *Pseudomonas aeruginosa* PA14 biofilms. *Mol Microbiol* 51(3):675-690.
9. Shen Y, Siryaporn A, Lecuyer S, Gitai Z, & Stone HA (2012) Flow directs surface-attached bacteria to twitch upstream. *Biophys J* 103(1):146-151.
10. Kuchma SL, *et al.* (2010) Cyclic-di-GMP-mediated repression of swarming motility by *Pseudomonas aeruginosa*: the *pilY1* gene and its impact on surface-associated behaviors. *J Bacteriol* 192(12):2950-2964.
11. Merritt JH, *et al.* (2010) Specific control of *Pseudomonas aeruginosa* surface-associated behaviors by two c-di-GMP diguanylate cyclases. *mBio* 1(4).
12. Liberati NT, *et al.* (2006) An ordered, nonredundant library of *Pseudomonas aeruginosa* strain PA14 transposon insertion mutants. *Proceedings of the National Academy of Sciences of the United States of America* 103(8):2833-2838.
13. Ralph P & Nakoinz I (1975) Phagocytosis and cytolysis by a macrophage tumour and its cloned cell line. *Nature* 257(5525):393-394.
14. Hoang TT, Kutchma AJ, Becher A, & Schweizer HP (2000) Integration-proficient plasmids for *Pseudomonas aeruginosa*: site-specific integration and use for engineering of reporter and expression strains. *Plasmid* 43(1):59-72.

15. Hoang TT, Karkhoff-Schweizer RR, Kutchma AJ, & Schweizer HP (1998) A broad-host-range Flp-FRT recombination system for site-specific excision of chromosomally-located DNA sequences: application for isolation of unmarked *Pseudomonas aeruginosa* mutants. *Gene* 212(1):77-86.
16. Shanks RM, Caiazza NC, Hinsa SM, Toutain CM, & O'Toole GA (2006) *Saccharomyces cerevisiae*-based molecular tool kit for manipulation of genes from gram-negative bacteria. *Applied and environmental microbiology* 72(7):5027-5036.
17. Cowles KN & Gitai Z (2010) Surface association and the MreB cytoskeleton regulate pilus production, localization and function in *Pseudomonas aeruginosa*. *Mol Microbiol* 76(6):1411-1426.
18. Choi KH, *et al.* (2005) A Tn7-based broad-range bacterial cloning and expression system. *Nature methods* 2(6):443-448.
19. Lesic B & Rahme LG (2008) Use of the lambda Red recombinase system to rapidly generate mutants in *Pseudomonas aeruginosa*. *BMC molecular biology* 9:20.
20. Lanzer M & Bujard H (1988) Promoters largely determine the efficiency of repressor action. *Proceedings of the National Academy of Sciences of the United States of America* 85(23):8973-8977.
21. Siryaporn A, Perchuk BS, Laub MT, & Goulian M (2010) Evolving a robust signal transduction pathway from weak cross-talk. *Mol Syst Biol* 6:452.
22. Pearson JP, *et al.* (1994) Structure of the autoinducer required for expression of *Pseudomonas aeruginosa* virulence genes. *Proceedings of the National Academy of Sciences of the United States of America* 91(1):197-201.
23. Ochsner UA & Reiser J (1995) Autoinducer-mediated regulation of rhamnolipid biosurfactant synthesis in *Pseudomonas aeruginosa*. *Proceedings of the National Academy of Sciences of the United States of America* 92(14):6424-6428.
24. Franceschini A, *et al.* (2013) STRING v9.1: protein-protein interaction networks, with increased coverage and integration. *Nucleic acids research* 41(Database issue):D808-815.
